# Supplementary material for: A tetrahydroacridine derivative and its conjugate with gold nanoparticles: promising agents for the treatment of Alzheimer's disease
Source: Royal Society of Chemistry journal article supplement (doi:10.1039/d3cp00767g), 2023-01-01
Supplement: d3cp00767g1.pdf [file d3cp00767g1.pdf]

## Electronic Supplementary Information

### Tetrahydroacridine derivative and its conjugate with gold nanoparticles: Promising agents for the treatment of Alzheimer's disease

*Ilona Mojzych<sup>1</sup>, Anna Zawadzka<sup>1</sup>, Katarzyna Kaczyńska<sup>2,\*</sup>, Piotr Wojciechowski<sup>2</sup>, Dominika Zajac<sup>2</sup>, Maciej Chotkowski<sup>1</sup>, Katarzyna Wiktorska<sup>3,4</sup>, Jan K. Maurin<sup>3</sup>, Maciej Mazur<sup>1,\*</sup>*

<sup>1</sup> Department of Chemistry, University of Warsaw, Pasteura 1, 02-093 Warsaw, Poland

<sup>2</sup> Department of Respiration Physiology, Mossakowski Medical Research Institute, Polish Academy of Sciences, Pawińskiego 5, 02-106 Warsaw, Poland

<sup>3</sup> National Medicines Institute, Chełmska 30/34, 00-725, Warsaw, Poland

<sup>4</sup> Department of Physics and Biophysics, Institute of Biology, Warsaw University of Life Sciences – SGGW, Nowoursynowska 166, 02-787 Warsaw, Poland

\*corresponding authors

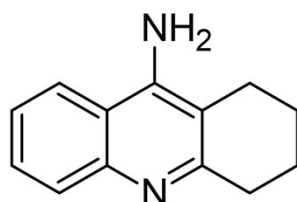

*Scheme S1. Chemical structure of tacrine.*

Table S1. Crystal data and structure refinement for CHDA

|                                   |                                                                               |
|-----------------------------------|-------------------------------------------------------------------------------|
| Empirical formula                 | C <sub>15</sub> H <sub>21</sub> Cl <sub>2</sub> N <sub>3</sub> O <sub>2</sub> |
| Formula weight                    | 346.25                                                                        |
| Temperature                       | 293(2) K                                                                      |
| Wavelength                        | 1.54178 Å                                                                     |
| Crystal system                    | Triclinic                                                                     |
| Space group                       | P-1                                                                           |
| Unit cell dimensions              | a = 7.0963(5) Å, α = 111.519(6)°                                              |
|                                   | b = 9.7638(7) Å, β = 96.992(5)°                                               |
|                                   | c = 12.7882(7) Å, γ = 92.865(6)°                                              |
| Volume                            | 813.85(9) Å <sup>3</sup>                                                      |
| Z                                 | 2                                                                             |
| Density (calculated)              | 1.413 Mg/m <sup>3</sup>                                                       |
| Absorption coefficient            | 3.679 mm <sup>-1</sup>                                                        |
| F(000)                            | 364                                                                           |
| Crystal size                      | 0.1914 x 0.0456 x 0.0246 mm <sup>3</sup>                                      |
| Theta range for data collection   | 3.76 to 69.92°                                                                |
| Index ranges                      | -8 ≤ h ≤ 7, -11 ≤ k ≤ 11, -15 ≤ l ≤ 15                                        |
| Reflections collected             | 14996                                                                         |
| Independent reflections           | 3030 [R(int) = 0.0764]                                                        |
| Completeness to theta = 69.92°    | 98.2 %                                                                        |
| Absorption correction             | Analytical                                                                    |
| Max. and min. transmission        | 0.924 and 0.691                                                               |
| Refinement method                 | Full-matrix least-squares on F <sup>2</sup>                                   |
| Data / restraints / parameters    | 3030 / 0 / 221                                                                |
| Goodness-of-fit on F <sup>2</sup> | 0.762                                                                         |
| Final R indices [I > 2σ(I)]       | R1 = 0.0364, wR2 = 0.0702                                                     |
| R indices (all data)              | R1 = 0.0880, wR2 = 0.0791                                                     |
| Extinction coefficient            | 0.0016(2)                                                                     |
| Largest diff. peak and hole       | 0.245 and -0.204 e·Å <sup>-3</sup>                                            |

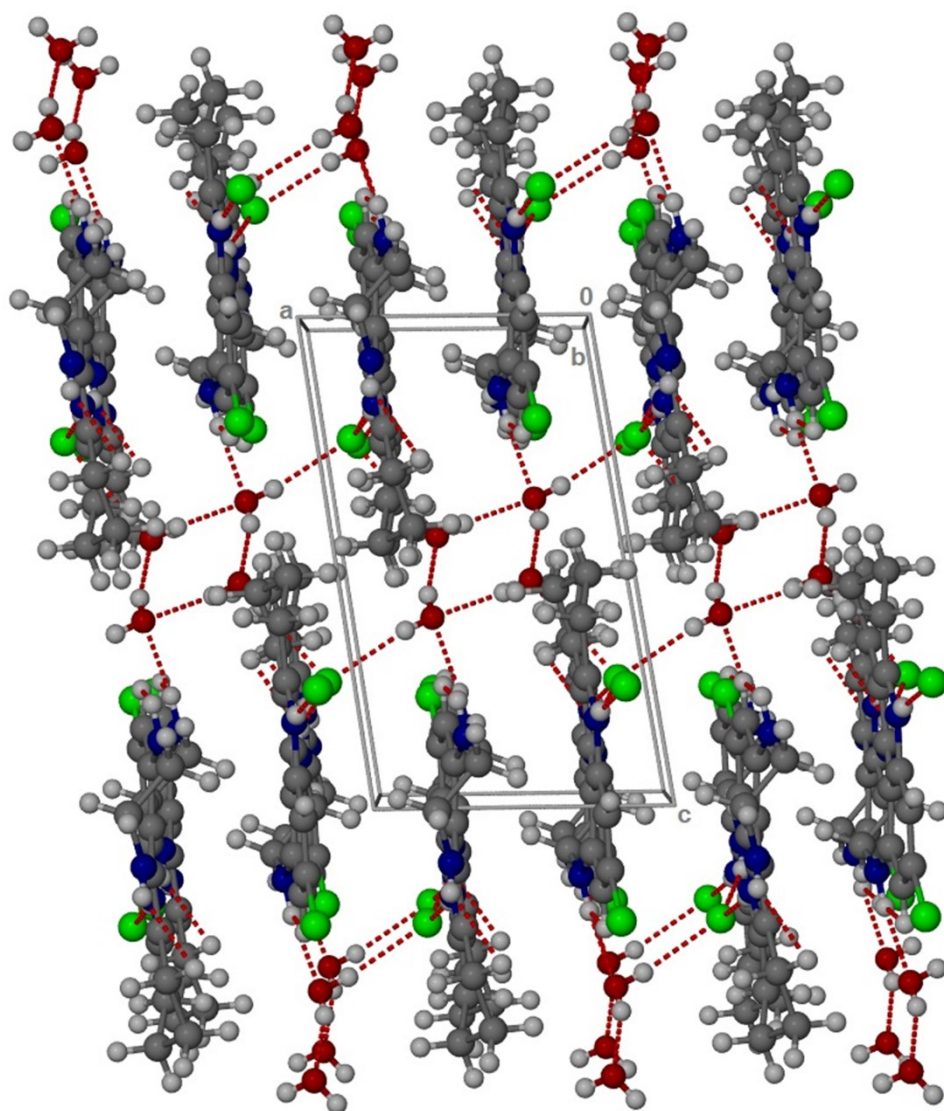

*Fig. S1. The view of crystal packing in the b direction. The molecules are shown in a ball-and-sticks representation. The N-H...O, O-H...O and N-H...Cl hydrogen bonds are shown as the dashed lines.*

Table S2. Hydrogen bonds for CHDA [ $\text{\AA}$  and  $^\circ$ ].

| D-H $\cdots$ A               | d(D-H)  | d(H $\cdots$ A) | d(D $\cdots$ A) | $\angle$ (DHA) |
|------------------------------|---------|-----------------|-----------------|----------------|
| N(1)-H(1) $\cdots$ Cl(2)     | 0.87(2) | 2.33(3)         | 3.198(2)        | 170(2)         |
| N(15)-H(15) $\cdots$ Cl(2)#1 | 0.84(2) | 2.57(3)         | 3.330(2)        | 151(2)         |
| N(18)-H(18) $\cdots$ O(1)    | 0.87(3) | 2.06(3)         | 2.883(3)        | 158(3)         |
| O(1)-H(1A) $\cdots$ O(2)     | 0.81(4) | 1.97(4)         | 2.758(4)        | 165(4)         |
| O(1)-H(1B) $\cdots$ Cl(2)#2  | 0.81(4) | 2.44(4)         | 3.243(3)        | 172(4)         |
| O(2)-H(2A) $\cdots$ Cl(2)#3  | 0.78(4) | 2.45(4)         | 3.232(3)        | 177(5)         |
| O(2)-H(2B) $\cdots$ O(1)#4   | 0.80(5) | 2.04(5)         | 2.835(4)        | 175(5)         |

Symmetry transformations used to generate equivalent atoms:

#1  $x, y+1, z$  #2  $-x, -y+2, -z+2$  #3  $x, y+1, z+1$  #4  $-x+1, -y+3, -z+3$

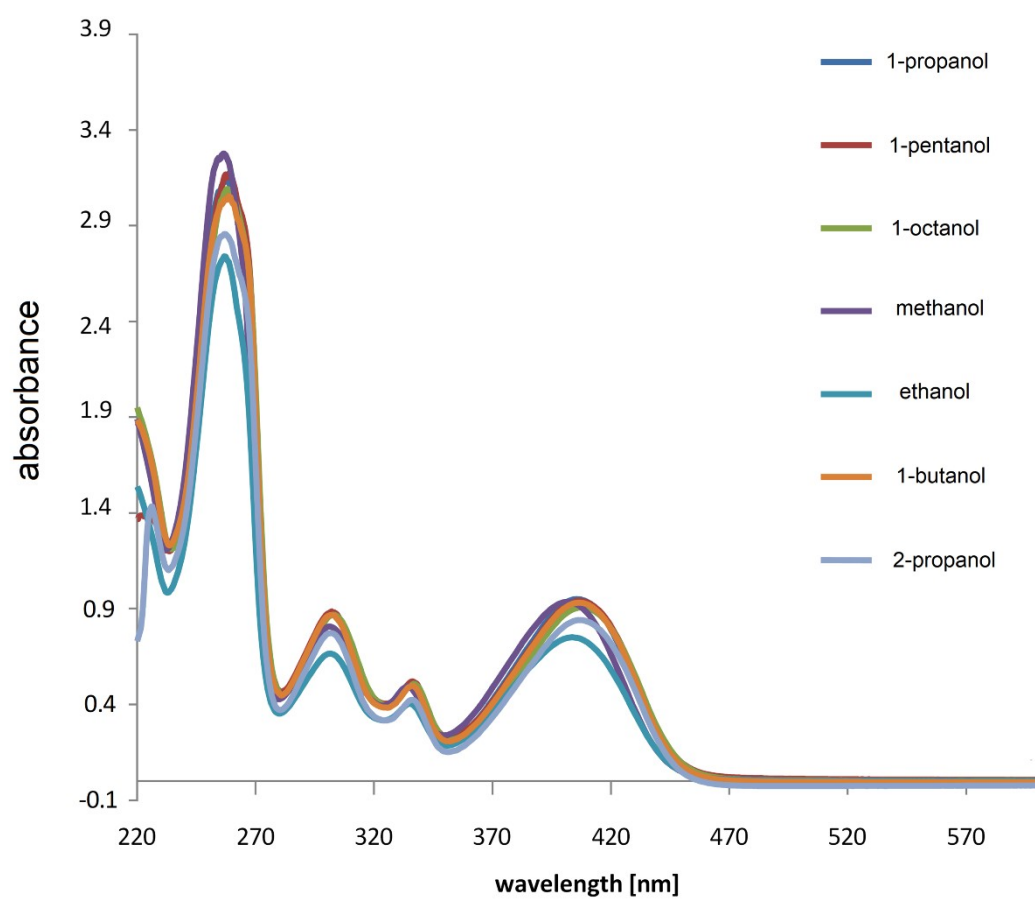

*Fig. S2. UV VIS absorption spectra of CHDA recorded in various solvents.*

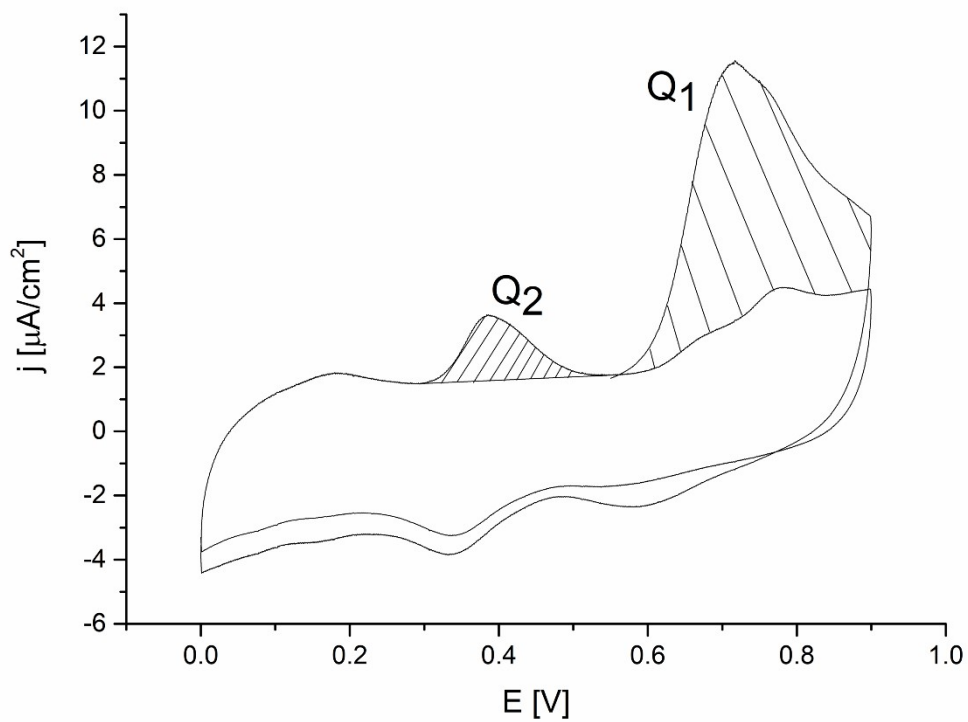

*Fig. S3. Schematic diagram of the determination of the charge associated with one-electron oxidation of CHDA adsorbed on the gold electrode surface (the charge is equal to the difference of  $Q_1$  and  $Q_2$ ).*

c

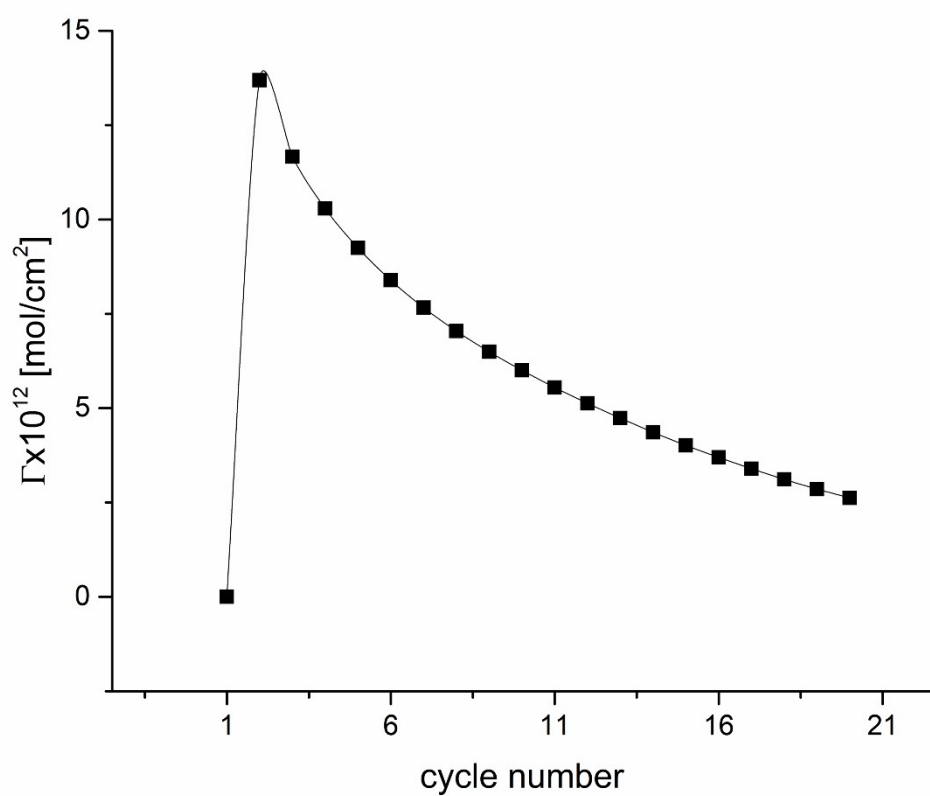

*Fig. S4. Dependence of surface concentration of redox species giving oxidation peaks at 0.35 V (both isomeric forms) as a function of voltammetric cycle number.*

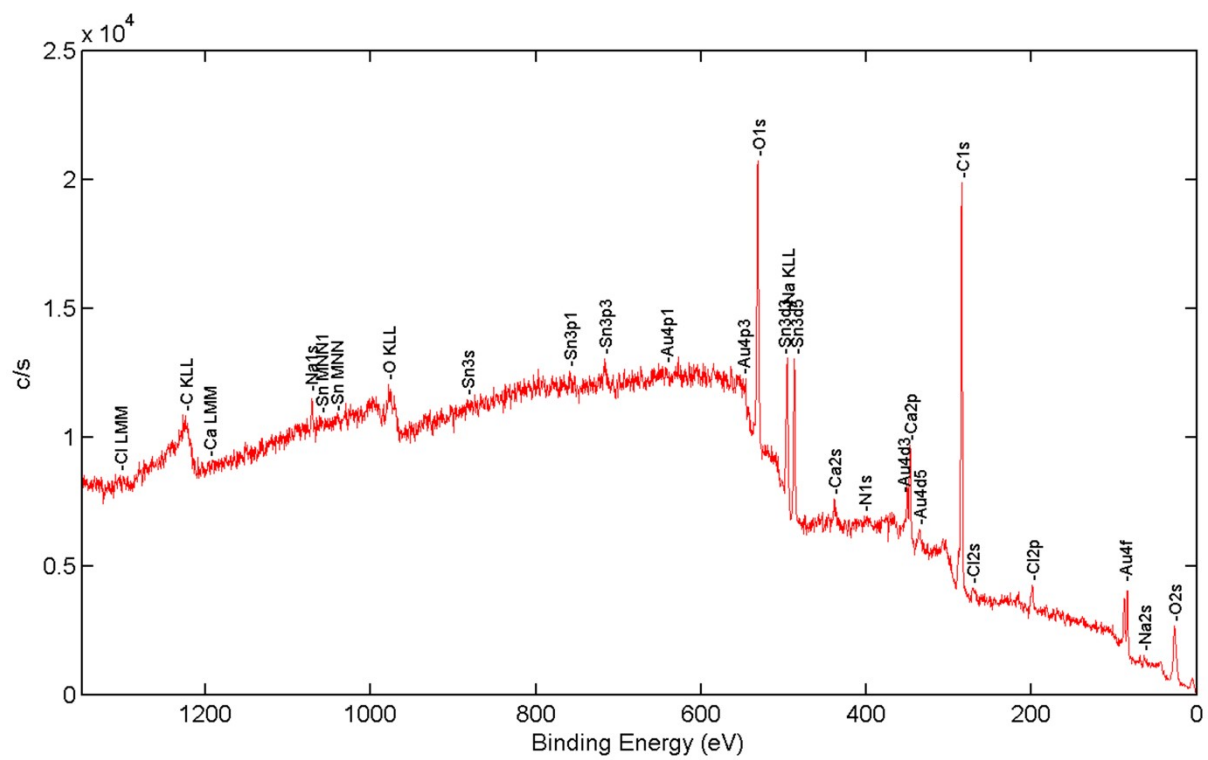

Fig. S5. XPS survey spectrum of CHDA/AuNps conjugate.



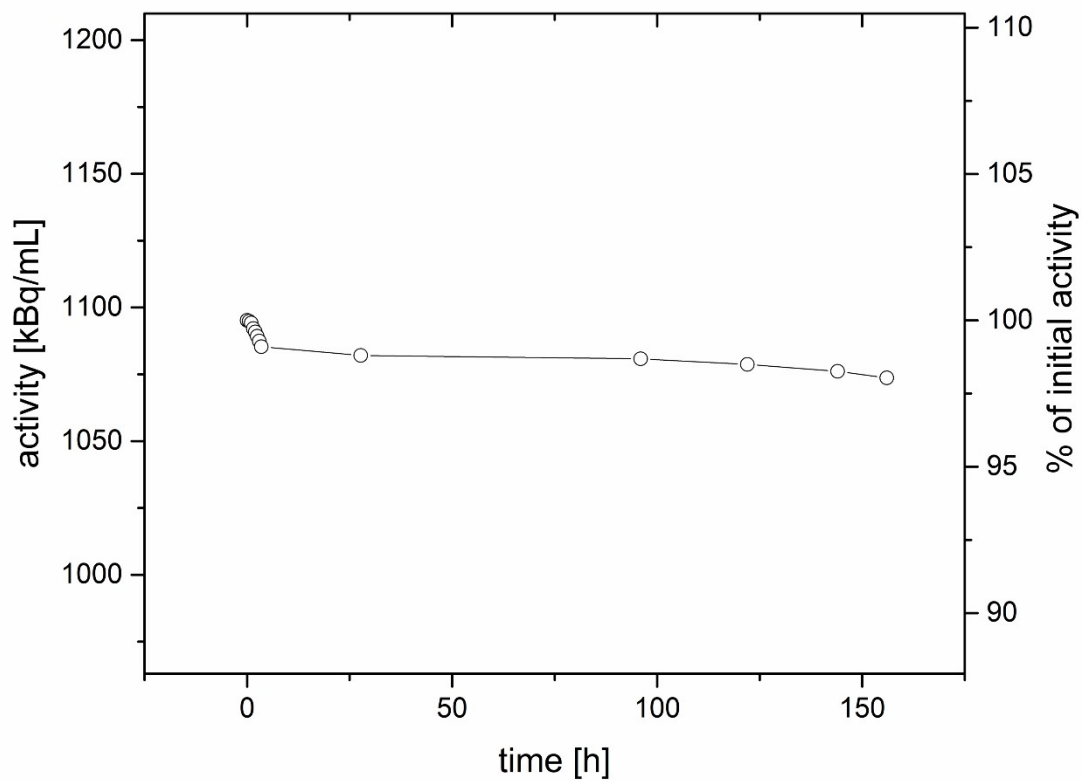

*Fig. S6. Purification of CHDA/<sup>198</sup>AuNps conjugates by dialysis. Activity (left axis) and % of initial activity (right axis) of conjugate solution versus dialysis time.*
